# Supplementary material for: Integrating Metabolomics and Network Pharmacology to Decipher the Hepatoprotective Effect Mechanisms of Magnesium Isoglycyrrhizinate Injection
Source: MDPI journal article supplement (doi:10.3390/cimb46010019), 2023-12-29
Supplement: s1 [file s1]

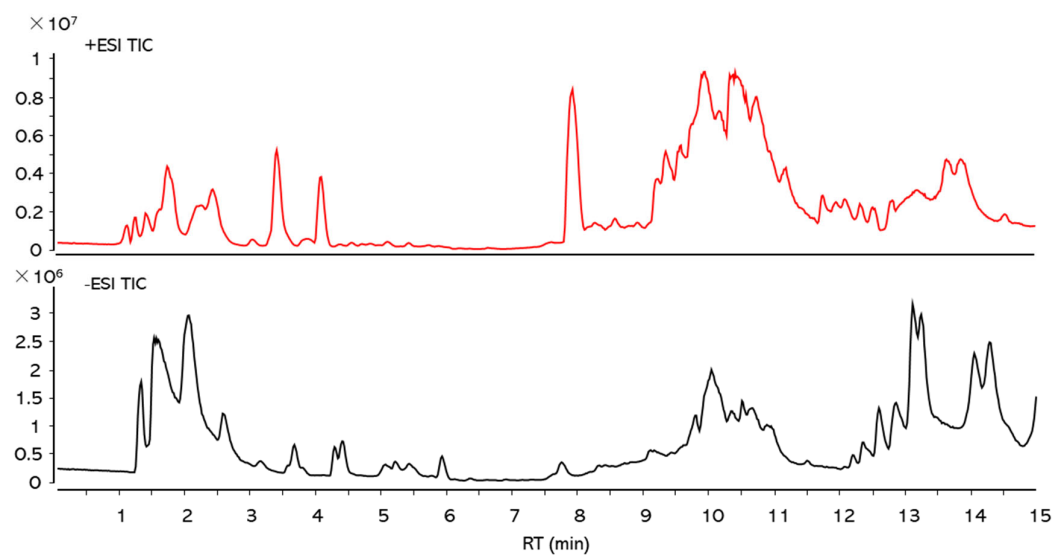

**Figure S1.** The the total ion chromatogram (TIC) of real samples. The top is TIC in positive ion mode, and the bottom is TIC in negative ion mode.
